# Supplementary material for: Air bubbling for membrane fouling control in a submerged direct forward osmosis system for municipal wastewater treatment
Source: Royal Society of Chemistry journal article supplement (doi:10.1039/c8ew00813b), 2019-01-01
Supplement: c8ew00813b1.pdf [file c8ew00813b1.pdf]

Supplementary Information

## **Air bubbling for membrane fouling control in submerged direct forward osmosis system for municipal wastewater treatment**

Yan Sun<sup>a,b,1</sup>, Shanshan Gao<sup>a,1</sup>, Jiayu Tian<sup>a,\*</sup>, Xiujuan Hao<sup>b</sup>, Zhiquan Liu<sup>b,\*</sup>, Wenxin Shi<sup>c</sup>, Fuyi Cui<sup>c</sup>

<sup>a</sup> School of Civil Engineering and Transportation, Hebei University of Technology, Tianjin 300401, China

<sup>b</sup> State Key Laboratory of Urban Water Resource and Environment, Harbin Institute of Technology, Harbin 150090, China

<sup>c</sup> College of Urban Construction and Environmental Engineering, Chongqing University, Chongqing 400044, China

<sup>1</sup> These authors contributed equally to this work

\*Corresponding authors. E-mail address: [tjy800112@163.com](mailto:tjy800112@163.com); [fox\\_fm3@sina.com](mailto:fox_fm3@sina.com)

Supplementary Information: 4 pages, 3 figure.

List of Table and Figures:

Page 2 **Fig. S1.** The main quality of raw municipal wastewater used each day.

Page 3 **Fig. S2.** Flux decline from day 1 to day 15 in the submerged direct FO<sub>N.A.</sub> and FO<sub>A.</sub> systems.

Page 4 **Fig. S3.** EDS analysis of the fouled surface of FO membrane without (a) and with (b) air bubbling conditions in feed solution.

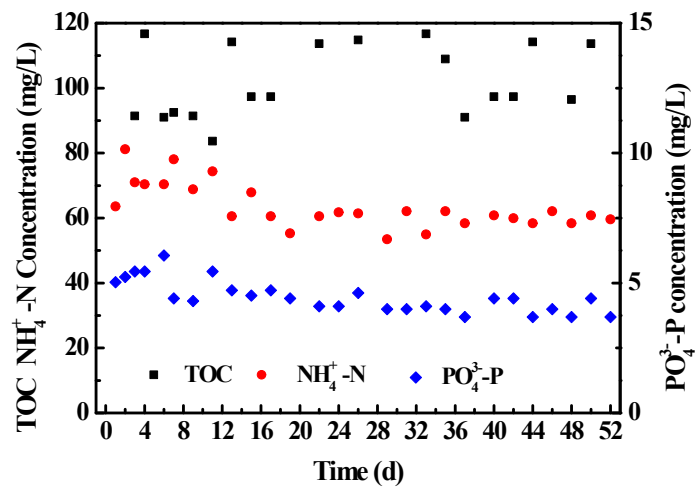

**Fig.S1.** The main quality of raw municipal wastewater used each day.

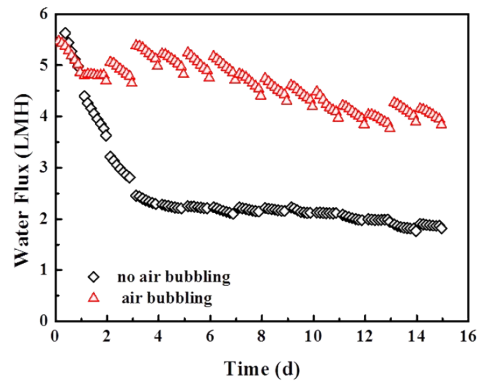

**Fig. S2.** Flux decline from day 1 to day 15 in the submerged direct FO<sub>N.A.</sub> and FO<sub>A.</sub> systems.

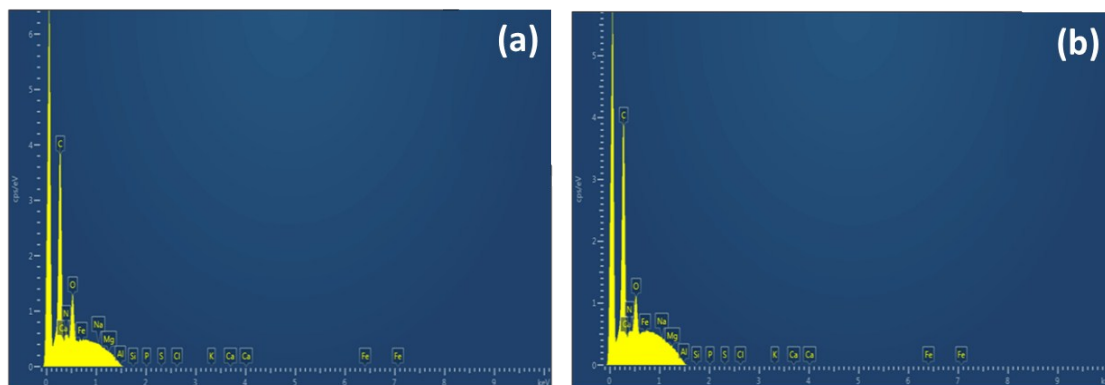

**Fig.S3.** EDS analysis of the fouled surface of FO membrane without (a) and with (b) air bubbling conditions in feed solution.
